# Supplementary material for: Genomic analysis of 63,220 tumors reveals insights into tumor uniqueness and targeted cancer immunotherapy strategies
Source: PubMed Central journal article supplement (PMC5324279; doi:10.1186/s13073-017-0408-2), 2017-02-24
Supplement: 13073_2017_408_MOESM1_ESM.pdf [file 13073_2017_408_MOESM1_ESM.pdf]

## **ADDITIONAL FILE 1: Supplementary Figures**

### **Genomic analysis of 63,220 tumors reveals insights into tumor uniqueness and targeted cancer immunotherapy strategies**

Ryan J. Hartmaier<sup>1,\*</sup>, Jehad Charo<sup>2</sup>, David Fabrizio<sup>1</sup>, Michael E. Goldberg<sup>1</sup>, Lee A. Albacker<sup>1</sup>, William Pao<sup>2</sup>, Juliann Chmielecki<sup>1</sup>

1. Foundation Medicine, Inc., Cambridge MA, USA
2. Roche Pharma Research & Early Development, Basel, Switzerland

## SUPPLEMENTAL FIGURES

Figure S1

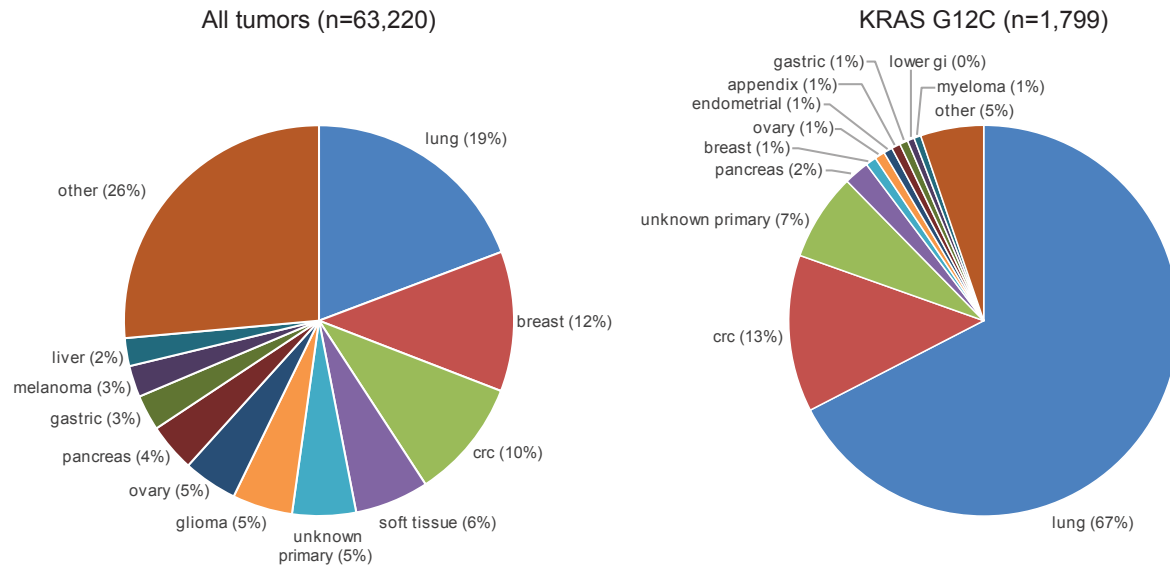

**Figure S1: Tumor type breakdown.**

Pie charts show the breakdown of tumor types across all tumors (n=63,220) and within the KRAS G12C containing tumors (n=1,799). The top 11 tumor types are shown with all others being categorized as 'other.'

Figure S2

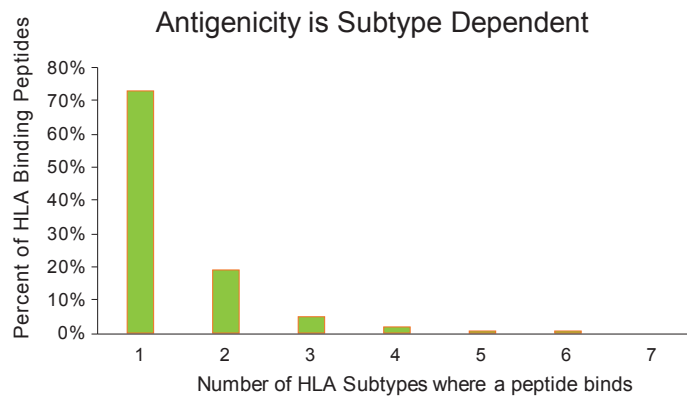

**Figure S2: Antigenicity is HLA-subtype dependent**

MHC-I binders were determined across 12 common HLA-subtypes. The total number of HLA-subtypes predicted to bind a given peptide were counted. Most peptides bind to a single HLA-subtype.

Figure S3

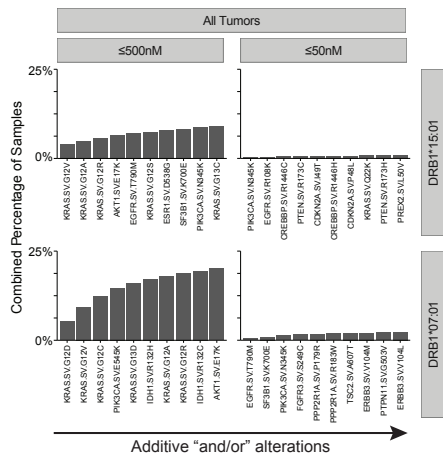

**Figure S3: Applicability of poly-neoantigen, non-individualized targeted cancer immunotherapies MHC-II binding predictions**

Top additive “and/or” alterations predicted to produce an MHC-II neoantigen are shown for all tumors using ‘low’ and ‘high’ affinity thresholds (500nM and 50nM). This was done for two common HLA-DRB1 subtypes (DRB1\*15:01 and DRB1\*07:01).
